# Supplementary material for: Inkjet-printed paper-based electrochemical sensor with gold nano-ink for detection of glucose in blood serum
Source: Royal Society of Chemistry journal article supplement (doi:10.1039/d1nj00771h), 2021-01-01
Supplement: d1nj00771h1.pdf [file d1nj00771h1.pdf]

**Electronic Supplementary Information**

**Inkjet-Printed Paper-Based Electrochemical Sensor with Gold Nano-Ink for  
Detection of Glucose in Blood Serum**

**Tushar Kant<sup>1</sup>, Kamlesh Shrivastava<sup>1\*</sup>, Kavita Tapadia<sup>2</sup>, Rama Devi<sup>2</sup>, Vellaichamy Ganesan<sup>3</sup>  
and Manas Kanti Deb<sup>1</sup>**

**<sup>1</sup>School of Studies in Chemistry, Pt. Ravishankar Shukla University, Raipur- 492010**

**(C.G.), India**

**<sup>2</sup>Department of Chemistry, National Institute of Technology, Raipur- 492010 (C.G.), India**

**<sup>3</sup>Department of Chemistry, Institute of Science, Banaras Hindu University, Varanasi-**

**221005, UP, India**

Corresponding author email: [kshrivas@gmail.com](mailto:kshrivas@gmail.com)

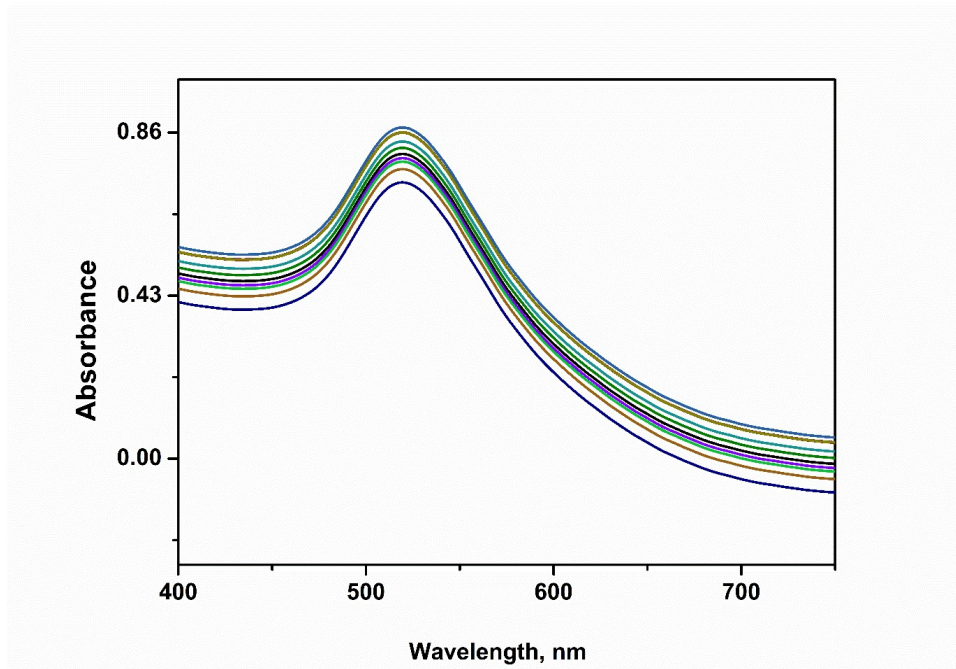

**Fig. S1.** UV-Vis spectra of AuNPs/starch analyzed for 50 consecutive days.

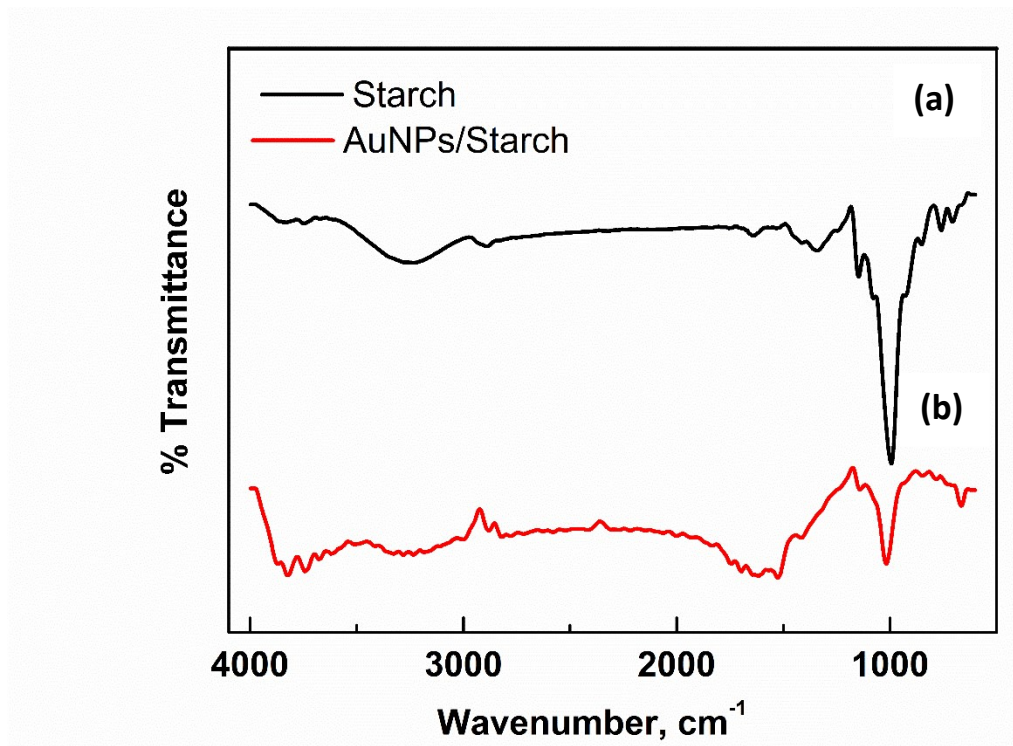

**Fig. S2.** FTIR spectra of (a) pure starch and (b) AuNPs/starch.

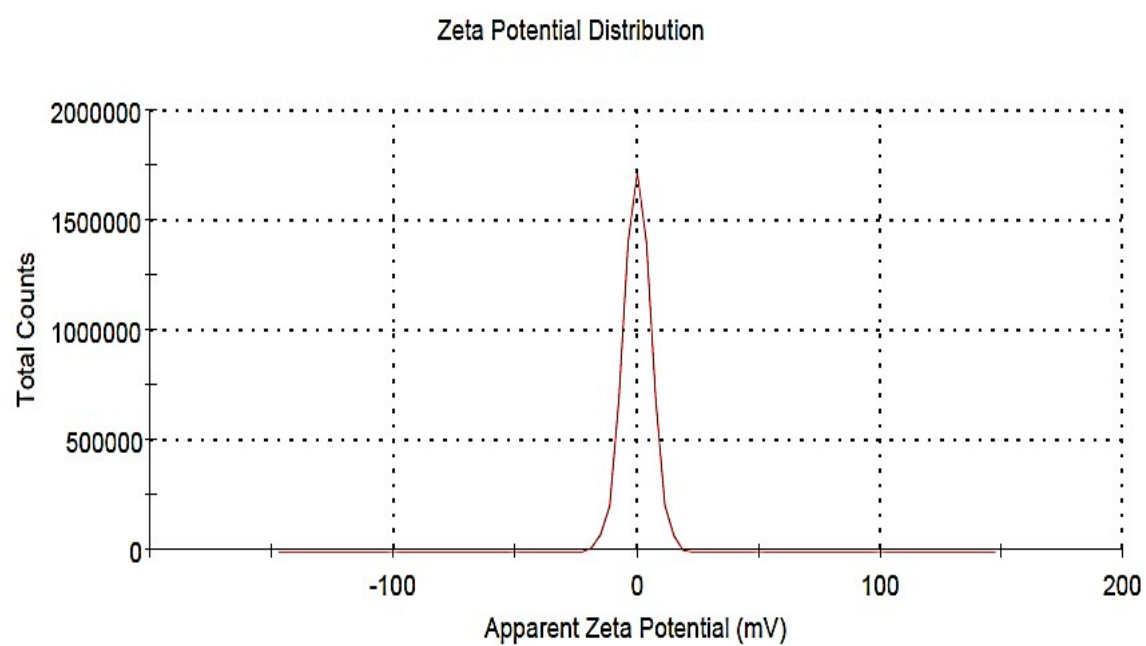

**S3.** Zeta potential measurement of AuNPs/starch

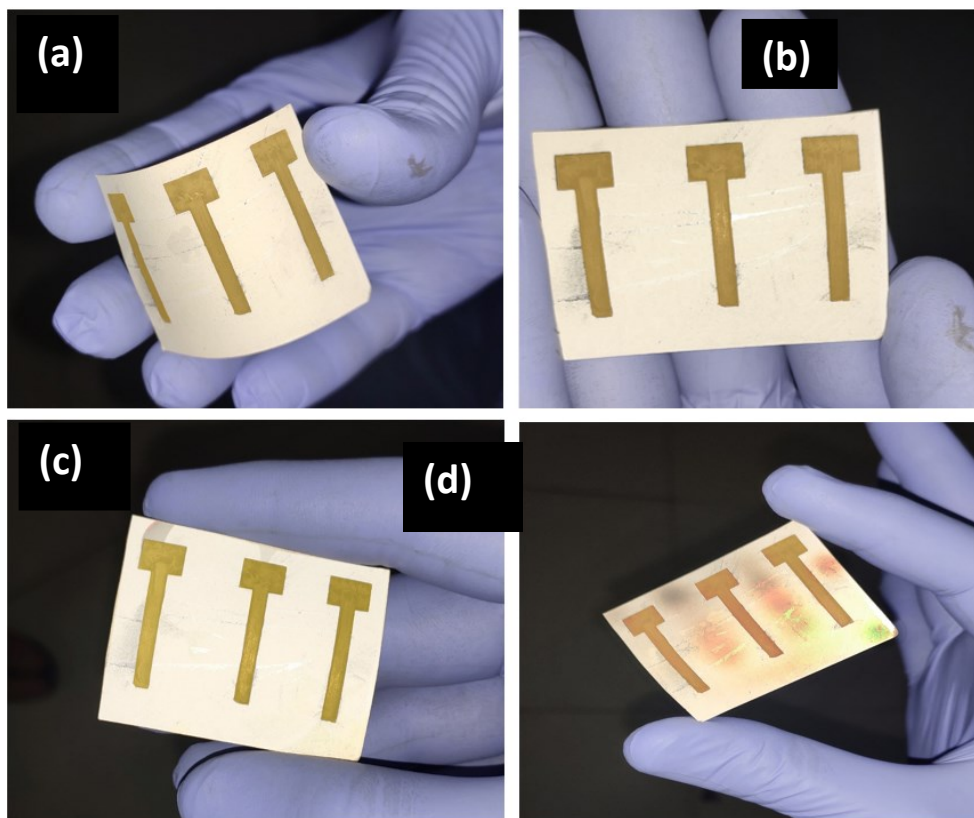

**Fig. S4.** Inkjet-printed (with nano-ink) on different paper substrates(a) photopaper (b) normal printing paper (c) Whatman filter paper No.1and (d) bond paper

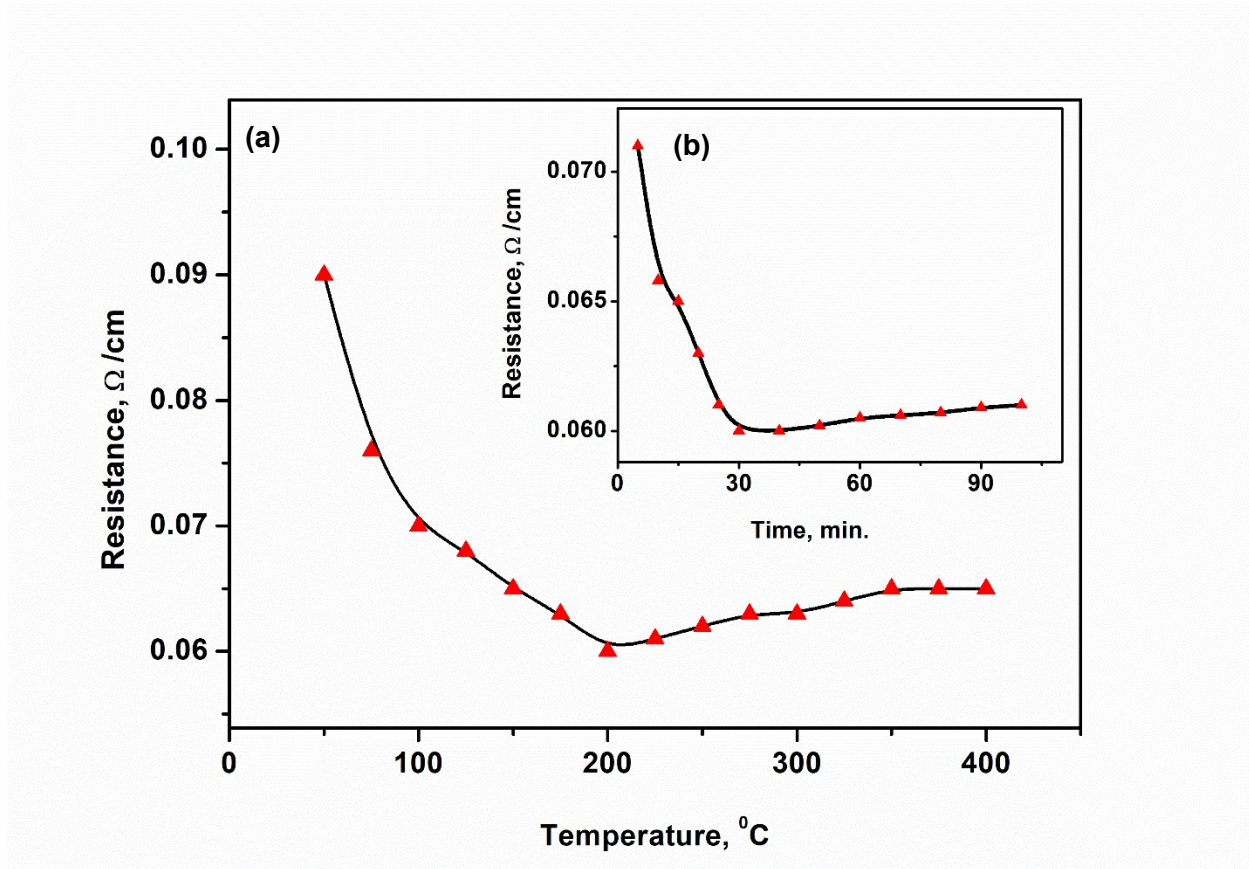

**Fig. S5.** Effect of sintering temperature on fabricated AuNPs-PPE from 50 to 110 $^{\circ}C$ . (b) Effect of sintering time from 5 to 35 min on resistance value in ohm/cm

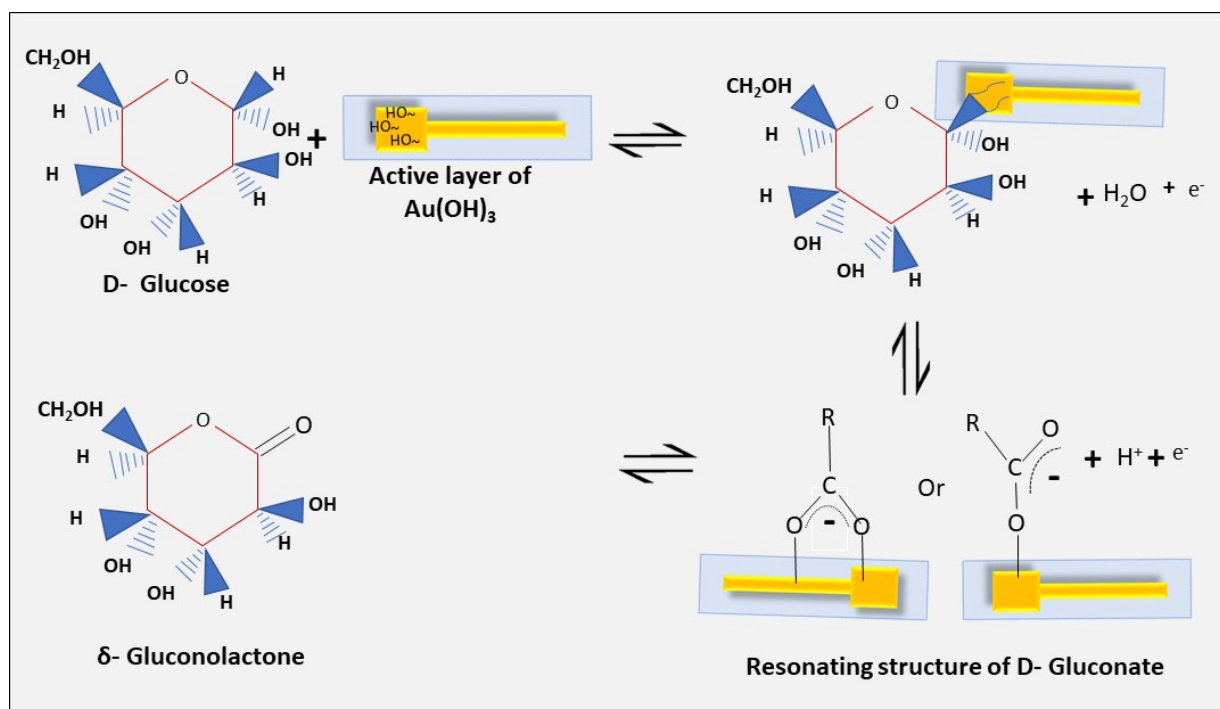

**Fig. S6.** Proposed mechanism for the detection of glucose through the electrochemical oxidation glucose on AuNPs-PPE.

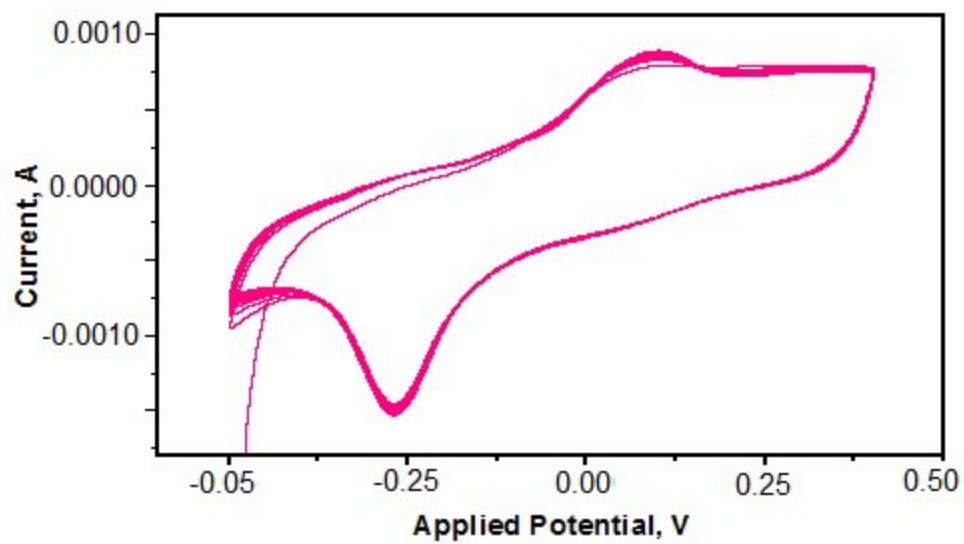

**Fig. S7.** Continuous 50 CV cycles of 5 mM glucose in PBS (0.1 M, pH 9.2) with a scan rate of  $10 \text{ mV s}^{-1}$  when AuNPs-PPE is used as a working electrode.



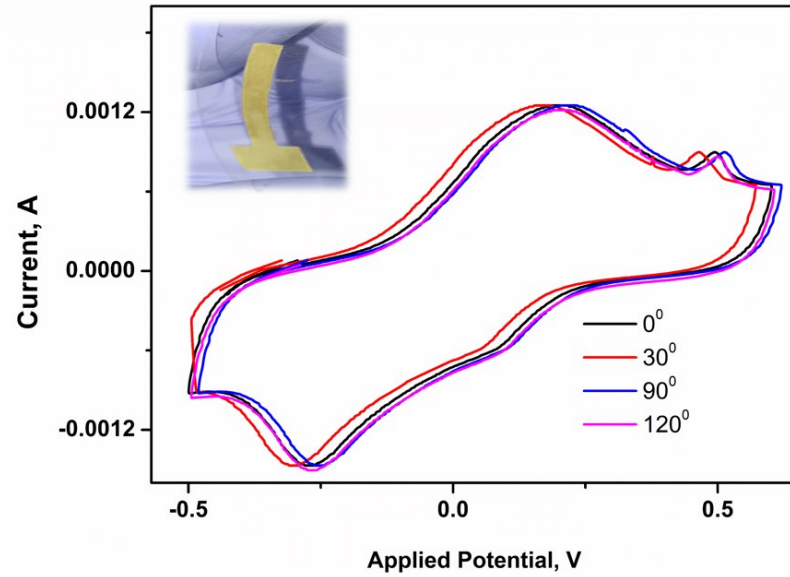

**Fig S. 8.** CV response observed for 10 mM glucose at  $10 \text{ mV s}^{-1}$  scan rate in PBS (0.1 mM, 9.2 pH) when AuNPs-PPE bended at different angles (30, 90, and 120 degree)



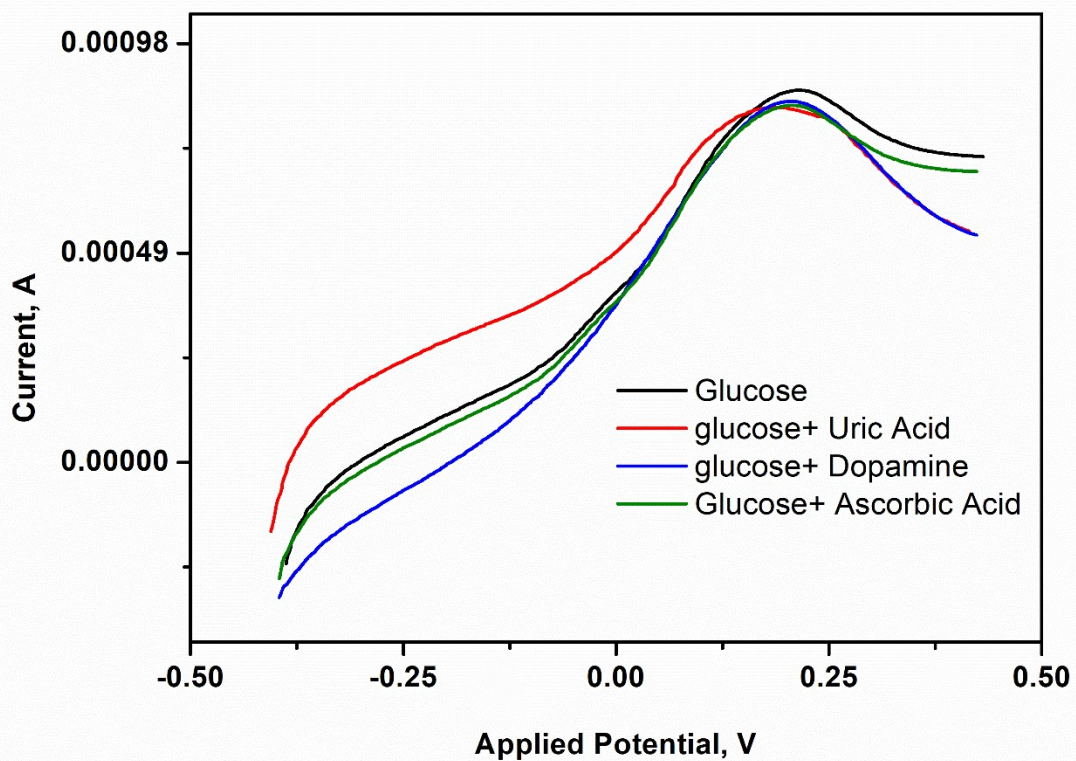

**Fig. S9.** Effects of uric acid (10 mM), dopamine (10 mM) and ascorbic acid (10 mM) toward the electrocatalytic oxidation of glucose (5 mM) using AuNPs-PPE in PBS (0.1 M,) at a scan rate of 10 mVs<sup>-1</sup>

| <b>Table S1.</b> Determination of glucose in blood serum sample            |                      |                                         |                                                |                        |                                         |
|----------------------------------------------------------------------------|----------------------|-----------------------------------------|------------------------------------------------|------------------------|-----------------------------------------|
| Glucose found, mM using<br>AuNPs-PPE as an electrochemical sensor<br>(n=6) |                      |                                         | Glucose found, mM using<br>Glucometer<br>(n=5) |                        |                                         |
| $x_{i1}$                                                                   | $x_{i1} - \bar{x}_1$ | $(x_{i1} - \bar{x}_1)^2$                | $x_{i2}$                                       | $(x_{i2} - \bar{x}_2)$ | $(x_{i2} - \bar{x}_2)^2$                |
| 5.33                                                                       | 0.02                 | 0.0004                                  | 5.34                                           | 0.04                   | 0.0016                                  |
| 5.30                                                                       | -0.01                | 0.0001                                  | 5.29                                           | -0.01                  | 0.0001                                  |
| 5.28                                                                       | -0.03                | 0.0009                                  | 5.30                                           | 0.00                   | 0.0000                                  |
| 5.35                                                                       | 0.04                 | 0.0016                                  | 5.28                                           | -0.02                  | 0.0004                                  |
| 5.29                                                                       | -0.02                | 0.0004                                  | 5.32                                           | -0.03                  | 0.0009                                  |
| 5.31                                                                       | 0.00                 | 0.0000                                  | 5.33                                           | 0.03                   | 0.0009                                  |
| $\bar{x}_1 = 5.31$                                                         |                      | $\Sigma(x_{i1} - \bar{x}_1)^2 = 0.0034$ | $\bar{x}_2 = 5.30$                             |                        | $\Sigma(x_{i2} - \bar{x}_2)^2 = 0.0039$ |

**F-test:** It is the ratio of square of the standard deviation of two analytical methods

$$F = \frac{S_1^2}{S_2^2}$$

Where S1 and S2 standard deviations of two methods respectively, F is variance

$$S_1^2 = \frac{\sum (x_{i1} - \bar{x}_1)^2}{N_1 - 1} = \frac{0.0034}{6 - 1} = 6.8 \times 10^{-4}$$

$$S_2^2 = \frac{\sum (x_{i2} - \bar{x}_2)^2}{N_2 - 1} = \frac{0.0039}{5 - 1} = 9.7 \times 10^{-4}$$

$$F = \frac{6.8 \times 10^{-4}}{9.7 \times 10^{-4}}$$

**F= 0.70**

- At 95%, the tabulated F value for  $v_1=5$  and  $v_2= 4$  is 6.26

- The calculated F value less than tabulated F value at 95% confidence level, then there is no significant difference between the variance of the two methods, so the two methods have comparable standard deviation and t test can be applied:

### t-test

$$\pm t = \frac{(\bar{x}_1 - \bar{x}_2) \sqrt{N_1 N_2}}{S_p \sqrt{N_1 + N_2}}$$

$$S_p = \sqrt{\frac{\sum((x_{i1} - \bar{x}_1)^2 + \sum(x_{i2} - \bar{x}_2)^2)}{N_1 + N_2 - 2}}$$

$$= \sqrt{\frac{0.0034 + 0.0039}{6 + 5 - 2}}$$

$$S_p = 0.028$$

$$\pm t = \frac{(\bar{x}_1 - \bar{x}_2) \sqrt{N_1 N_2}}{S_p \sqrt{N_1 + N_2}}$$

$$= \frac{(5.31 - 5.30)}{0.028} \sqrt{\frac{6 \times 5}{6 + 5}}$$

$$\pm t = 0.35 \times 1.64$$

$$\pm t = 0.58$$

\* The tabulated t value for nine degrees of freedom ( $N_1 + N_2 - 2$ ) at the 95% confidence level is 2.262 and the thus calculated value is less than tabulated value and thus there is no statistical difference in the results by two methods.
